# Supplementary material for: Oncogenic EML4-ALK assemblies suppress growth factor perception and modulate drug tolerance
Source: Springer Nature journal article supplement (doi:10.1038/s41467-024-53451-7), 2024-11-02
Supplement: MOESM7 [file 41467_2024_53451_MOESM7_ESM.pdf]

## Description of Additional Supplementary Material Files

**Supplementary Movie 1. Suppression of GRB2 membrane translocation in the presence of EML4-ALK(V1)** GRB2-mNG2 localization in response to EGF (50 ng/mL) stimulation in Beas2B cells where GRB2 is tagged at the endogenous locus (*GRB2:mNG2*). Cells were transiently transfected with EML4-ALK(V1) such that only some cells expressed the construct. Arrows denote cells that do or do not express EML4-ALK(V1).

**Supplementary Movie 2. GRB2 dissociates from condensates upon ALK inhibition.** **inhibition.** GRB2-mNG2 localization in response to ALK inhibitor crizotinib (1  $\mu$ M). Arrows indicate cells that express EML4-ALK (V1).

**Supplementary Movie 3. EML4-ALK inhibition sensitizes STE1 cells to lower concentrations of EGF stimulation.** ErkKTR response in STE-1 cells in response to EGF stimulation at concentrations ranging from 0.5-50 ng/mL following 2 hrs of DMSO (top row) or ALKi (bottom row) pretreatment. Video is representative of quantification presented in Figure. 6B.

**Supplementary Movie 4. Spontaneous ErkKTR pulsing after ALK inhibition depends on EGFR and MMPs.** ErkKTR activity in STE-1 cells in response to DMSO, ALKi (1  $\mu$ M crizotinib) or ALKi in combination with EGFRi (1  $\mu$ M erlotinib) or ALKi+MMPi (10  $\mu$ M marimastat). Videos are representative of quantification presented in Figure 6C-L. Time is in hh:mm.

**Supplementary Movie 5. Caspase inhibition does not decrease ALKi-induced Erk activity pulses.** ErkKTR activity (top row) and respective H2B-iRFP fluorescent nuclei (bottom row) in STE-1 cells in response to treatment with ALKi (crizotinib, 1  $\mu$ M) or ALKi in combination with pan-caspase inhibitor (z-VAD 50 nM). Pan-caspase inhibitor was added 2 hours prior to onset of experiment, and ALKi was added with onset of imaging. Video is representative of quantification Figure S8 C-E.
